# Supplementary material for: Nitrogen Budget and Statistical Entropy Analysis of the Tiber River Catchment, a Highly Anthropized Environment
Source: MDPI journal article supplement (doi:10.3390/soilsystems6010017), 2022-02-02
Supplement: s1 [file s1]

Archive with 3 entries (3 files):
- File S1.pdf
- File S2.pdf
- File S3.pdf
