# Supplementary material for: Nitrogen Budget and Statistical Entropy Analysis of the Tiber River Catchment, a Highly Anthropized Environment
Source: MDPI journal article supplement (doi:10.3390/soilsystems6010017), 2022-02-02
Supplement: s1 [file s1 › File S1.pdf]

## File S1

Animal categories that are considered in the ISTAT database for calculating the N contribution by livestock manure.

| Usage category                             | Animal species | Destination                                     | Age / weight limits                                                     | Sex   |
|--------------------------------------------|----------------|-------------------------------------------------|-------------------------------------------------------------------------|-------|
| Farmed calf                                | Bovine         | Farm                                            | 0-6 months                                                              | M + F |
| Fattening calf                             | Bovine         | Slaughter before 6 months of age                | 0-6 months                                                              | M + F |
| Calf from the mother cow                   | Bovine         | Fattening                                       | 0-10 months                                                             | M + F |
| Breeding cattle                            | Bovine         | Farm                                            | 6-24 months                                                             | M + F |
| Fattening cattle (including suckling calf) | Bovine         | Slaughter after 6 months of age                 | 0-24 months                                                             | M + F |
| Dairy cow                                  | Bovine         | Commercial milk production                      | > 2 years                                                               | F     |
| Mother cow                                 | Bovine         | No commercial milk production                   | > 2 years                                                               | F     |
| Other                                      | Bovine         | Other bovine than the aforementioned categories |                                                                         | M + F |
| Piglet                                     | Pig            | Fattening and breeding                          | For the duration of breastfeeding                                       | M + F |
| Weaned pig                                 | Pig            | Fattening and breeding                          | From weaning up to 25 kg                                                | M + F |
| Fattening pig                              | Pig            | Fattening and breeding                          | From 25 kg of body weight, up to slaughter or up to 6 months (breeding) | M + F |
| Young sow                                  | Pig            | Farm                                            | From 6 months until the first birth                                     | F     |
| Lactating sow                              | Pig            | Farm                                            | For the duration of the lactation phase                                 | F     |
| Sow not nursing                            | Pig            | Farm                                            | Between one lactation phase and another                                 | F     |
| breeding pig                               | Pig            | Farm                                            | > 6 months                                                              | M     |

| Other                                      | Pig     | Other pig than the aforementioned categories     |                                     | M + F |
|--------------------------------------------|---------|--------------------------------------------------|-------------------------------------|-------|
| Laying hens (breeding)                     | Poultry | Commercial egg production                        | Young hens that do not yet lay eggs | F     |
| Laying hens (laying phase)                 | Poultry | Commercial egg production                        | Hens laying eggs                    | F     |
| Fattening chicken                          | Poultry | Poultry for fattening                            | From 1 day until slaughter          | M + F |
| Fattening turkey                           | Poultry | Turkeys for fattening                            | From 1 day until slaughter          | M + F |
| Parental line for fattening (breeding)     | Poultry | Parental lines of fattening animals              | Animals not yet sexually mature     | M + F |
| Parental line for fattening (laying phase) | Poultry | Parental lines of fattening animals              | Sexually mature animals             | M + F |
| Parent line laying hens (breeding)         | Poultry | Parental lines of laying hens                    | Animals not yet sexually mature     | M + F |
| Parental laying lines (laying phase)       | Poultry | Parental lines of laying hens                    | Sexually mature animals             | M + F |
| Other                                      | Poultry | Other poultry than the aforementioned categories |                                     | M + F |
| Young sheep                                | Sheep   |                                                  | <1 year                             | M + F |
| Adult sheep                                | Sheep   |                                                  | > 1 year                            | M + F |
| Young goat                                 | Goat    |                                                  | <1 year                             | M + F |
| Adult goat                                 | Goat    |                                                  | > 1 year                            | M + F |
| Young rabbit                               | Rabbit  |                                                  | Animals not yet sexually mature     | M + F |
| Adult rabbit                               | Rabbit  |                                                  | Sexually mature animals             | M + F |
| Camelids                                   | Other   | New/Old world camelids                           |                                     | M + F |
| Farmed game                                | Other   |                                                  |                                     | M + F |
