# Supplementary material for: Nitrogen Budget and Statistical Entropy Analysis of the Tiber River Catchment, a Highly Anthropized Environment
Source: MDPI journal article supplement (doi:10.3390/soilsystems6010017), 2022-02-02
Supplement: s1 [file s1 › File S3.pdf]

## File S3

### Predictors used in the Random Forest (RF) analysis.

Dependent variable: nitrogen retention =  $N_{\text{output}} - N_{\text{input}}$

#### *Nitrogen Loads*

- N load by atmospheric deposition (t N/yr)
- N load by residents (t N/yr)
- Total N load by biological fixation (t N/yr)
- Total N load due to livestock industry (t N/yr)
- Animal husbandry load density (kg N/ (ha SAU yr))

#### *Nitrogen Losses*

- N loss by biological fixation (t N/yr)
- N loss by non-biological fixation (t N/yr)
- Total N removal by denitrification density (kg N/ (ha SAU yr))
- Total N removal density (biological + non-biological fixation) (kg N/ (ha SAU yr))
- Total N removal by volatilisation density (kg N/ (ha SAU yr))
- Total N loss (sum of fractions effectively lost) (t N/yr)
- Total N loss by denitrification (Livestock + Agriculture) (t N/yr)

#### *Auxiliary predictors*

- Residents (nr. x 10<sup>6</sup>)
- Utilised Agricultural Area (ha)

### Distribution of individual items in sub-items not mentioned in the text.

#### *Total N load by biological fixation*

- total nitrogen load from alfalfa
- total nitrogen load from soy
- total nitrogen load from the dry bean
- total nitrogen load from the pea
- total nitrogen load from the bean, legumes, and other dried legumes
- total nitrogen load from pastures
- total nitrogen load from permanent lawns
- total nitrogen load from woody crops
- total nitrogen load from non-symbiotic fixation

#### *Nitrogen losses from non-nitrogen fixing plants (N loss by non-biological fixation)*

- Total nitrogen losses from cereal crops
- Total nitrogen losses from industrial and textile crops including aromatic plant crops
- Total nitrogen losses from open field horticultural crops (tomatoes)
- Total nitrogen losses from greenhouse horticultural crops
- Total nitrogen losses from floral crops and ornamental plants
- Total nitrogen losses from seedlings

- Total nitrogen losses from alternating forage crops
- Total nitrogen losses from agricultural tree crops (vineyards, olive groves, citrus groves, orchards, nurseries)
- Total nitrogen losses from family gardens

*Total N load due to livestock industry*

- Bovine
- Buffalo
- Horse
- Goats
- Sheep
- Pigs
- Poultry
- Rabbits
